# Supplementary material for: Volcanic Glass as a Proxy for Paleotopography Suggests New Features in Late-Miocene Oregon
Source: MDPI journal article supplement (doi:10.3390/atmos15050561), 2024-04-30
Supplement: s1 [file s1]

|                |       |      |      |       |       |      |      |      |      |       |      |       |        |       |
|----------------|-------|------|------|-------|-------|------|------|------|------|-------|------|-------|--------|-------|
| Site 1         |       |      |      |       |       |      |      |      |      |       |      |       |        |       |
| Spectrum Label | O     | Na   | Al   | Si    | Cl    | K    | Ca   | Ti   | Fe   | Total |      |       |        |       |
| Spectrum 1     | 45.89 | 2.68 | 5.88 | 33.92 | 0.09  | 3.63 | 0.16 |      | 0.96 | 93.2  |      |       |        |       |
| Spectrum 2     | 49.18 | 2.98 | 6.37 | 36.36 |       | 3.91 | 0.16 |      | 0.63 | 99.6  |      |       |        |       |
| Spectrum 3     | 46.8  | 2.84 | 6.12 | 34.59 |       | 3.72 | 0.14 |      | 0.53 | 94.74 |      |       |        |       |
| Spectrum 4     | 45.2  | 2.72 | 5.89 | 33.4  | 0.1   | 3.66 | 0.1  |      | 0.61 | 91.68 |      |       |        |       |
| Spectrum 5     | 44.47 | 2.79 | 5.75 | 32.82 | 0.07  | 3.56 | 0.16 | 0.06 | 0.53 | 90.22 |      |       |        |       |
| Spectrum 6     | 45.16 | 2.81 | 5.86 | 33.35 | 0.08  | 3.64 | 0.17 |      | 0.58 | 91.66 |      |       |        |       |
| Spectrum 8     | 45.76 | 2.61 | 5.9  | 33.8  |       | 3.93 | 0.13 | 0.13 | 0.55 | 92.82 |      |       |        |       |
| Site 2         |       |      |      |       |       |      |      |      |      |       |      |       |        |       |
| Spectrum Label | O     | Na   | Mg   | Al    | Si    | Cl   | K    | Ca   | Ti   | Mn    | Fe   | Ni    | Total  |       |
| Spectrum 10    | 49.29 | 2.92 |      | 6.39  | 36.47 | 0.12 | 3.94 | 0.15 |      |       | 0.62 |       | 99.91  |       |
| Spectrum 11    | 49.32 | 2.97 |      | 6.43  | 36.25 |      | 3.93 | 0.18 |      |       | 1.37 |       | 100.46 |       |
| Spectrum 12    | 48.13 | 2.87 |      | 6.21  | 35.61 |      | 3.96 | 0.16 |      |       | 0.57 |       | 97.51  |       |
| Spectrum 13    | 47.54 | 2.81 |      | 6.07  | 35.15 |      | 3.75 | 0.19 |      |       | 0.95 |       | 96.46  |       |
| Spectrum 14    | 46.79 | 2.81 | 0.02 | 6.05  | 34.55 | 0.11 | 3.77 | 0.11 | 0.1  |       | 0.59 |       | 94.91  |       |
| Spectrum 15    | 43.52 | 2.95 |      | 5.57  | 31.79 | 0.78 | 3.92 | 0.24 | 0.08 | 0.06  | 1.23 |       | 90.15  |       |
| Spectrum 16    | 43.73 | 2.57 |      | 5.61  | 32.14 | 0.07 | 3.46 | 0.2  | 0.1  | 0.08  | 1.15 | 0.1   | 89.2   |       |
| Spectrum 17    | 47.24 | 2    |      | 6.19  | 35.19 | 0.08 | 3.49 | 0.12 |      |       | 0.66 |       | 94.97  |       |
| Spectrum 18    | 46.95 | 2.8  |      | 6.11  | 34.71 |      | 3.74 | 0.15 |      |       | 0.59 |       | 95.05  |       |
| Spectrum 19    | 47.2  | 2.85 |      | 6.18  | 34.87 |      | 3.76 | 0.13 |      |       | 0.59 |       | 95.57  |       |
| Spectrum 20    | 46.78 | 2.79 |      | 6.04  | 34.62 |      | 3.68 | 0.15 |      |       | 0.62 |       | 94.69  |       |
| Spectrum 21    | 48.6  | 2.97 |      | 6.36  | 35.87 | 0.15 | 3.88 | 0.15 |      |       | 0.65 |       | 98.62  |       |
| Site 3         |       |      |      |       |       |      |      |      |      |       |      |       |        |       |
| Spectrum Label | O     | Na   | Mg   | Al    | Si    | S    | Cl   | K    | Ca   | Ti    | 8    | Mn    | Fe     | Total |
| Spectrum 22    | 44.55 | 2.65 |      | 5.8   | 32.94 |      | 0.07 | 3.58 | 0.15 | 0.05  |      |       | 0.43   | 90.22 |
| Spectrum 24    | 44.8  | 2.71 |      | 5.78  | 33.13 |      | 0.11 | 3.57 | 0.18 |       |      |       | 0.6    | 90.88 |
| Spectrum 25    | 43.91 | 2.58 |      | 5.67  | 32.51 |      | 0.11 | 3.52 | 0.12 |       |      |       | 0.58   | 89    |
| Spectrum 26    | 42.46 | 2.44 | 0.02 | 5.5   | 31.37 |      | 0.06 | 3.58 | 0.1  | 0.09  |      |       | 0.48   | 86.1  |
| Spectrum 27    | 23.73 | 0.14 |      | 1.45  | 0.14  |      |      | 0.05 | 0.06 | 10.38 | 0.34 | 1.47  | 50.84  | 88.61 |
| Spectrum 28    | 46.71 | 2.7  |      | 5.97  | 34.53 |      |      | 3.83 | 0.2  |       |      |       | 0.89   | 94.82 |
| Spectrum 29    | 44.26 | 2.57 |      | 5.61  | 32.76 |      |      | 3.58 | 0.21 |       |      |       | 0.83   | 89.81 |
| Spectrum 30    | 43.5  | 2.51 |      | 5.57  | 32    | 0.12 | 0.1  | 3.46 | 0.31 |       |      |       | 0.74   | 88.31 |
| Site 4         |       |      |      |       |       |      |      |      |      |       |      |       |        |       |
| Spectrum Label | O     | Na   | Al   | Si    | Cl    | K    | Ca   | Ti   | Mn   | Fe    | Ba   | Total |        |       |
| Spectrum 32    | 48.45 | 2.93 | 6.33 | 35.78 | 0.12  | 3.91 | 0.12 |      |      | 0.64  |      | 98.28 |        |       |
| Spectrum 33    | 47.35 | 2.91 | 6.32 | 34.56 |       | 3.95 | 0.3  |      |      | 1.43  |      | 96.82 |        |       |
| Spectrum 34    | 48.67 | 2.9  | 6.25 | 35.98 |       | 3.87 | 0.13 | 0.12 |      | 0.65  |      | 98.57 |        |       |
| Spectrum 35    | 48.37 | 2.91 | 6.26 | 35.64 |       | 3.85 | 0.19 |      |      | 1.13  |      | 98.35 |        |       |
| Spectrum 36    | 45.55 | 2.8  | 6.09 | 33.22 |       | 3.69 | 0.19 | 0.11 |      | 1.41  |      | 93.06 |        |       |

|                |       |       |      |       |       |      |      |      |      |      |        |       |      |        |
|----------------|-------|-------|------|-------|-------|------|------|------|------|------|--------|-------|------|--------|
| Spectrum 37    | 46.66 | 4.4   | 6.22 | 34.05 |       | 1.14 | 0.3  |      |      | 1.45 | 0.3    | 94.51 |      |        |
| Spectrum 38    | 45.43 | 2.74  | 6.04 | 33.11 |       | 3.71 | 0.22 | 0.11 |      | 1.6  |        | 92.96 |      |        |
| Spectrum 39    | 46.5  | 2.87  | 6.21 | 33.86 | 0.1   | 3.75 | 0.28 | 0.15 |      | 1.5  |        | 95.21 |      |        |
| Spectrum 40    | 46.7  | 2.88  | 6.24 | 34.05 |       | 3.75 | 0.41 |      |      | 1.38 | 0.3    | 95.71 |      |        |
| Spectrum 41    | 47.18 | 3.28  | 6.29 | 34.38 |       | 3.25 | 0.23 | 0.11 | 0.12 | 1.44 |        | 96.28 |      |        |
| Spectrum 42    | 48.15 | 4.25  | 6.43 | 35.16 |       | 1.62 | 0.3  | 0.08 |      | 1.35 |        | 97.36 |      |        |
| Spectrum 43    | 46.52 | 2.84  | 6.17 | 33.92 |       | 3.81 | 0.34 | 0.09 |      | 1.53 |        | 95.2  |      |        |
| Site 5         |       |       |      |       |       |      |      |      |      |      |        |       |      |        |
| Spectrum Label | N     | O     | Na   | Al    | Si    | S    | Cl   | K    | Ca   | Ti   | Mn     | Fe    | Ba   | Total  |
| Spectrum 44    |       | 49.15 | 2.57 | 6.2   | 36.35 |      | 0.06 | 4.2  | 0.2  | 0.1  | 0.07   | 1.03  |      | 99.94  |
| Spectrum 45    |       | 55.96 | 0    | 0     | 49.11 |      |      | 0.03 | 0    |      |        | 0     |      | 105.1  |
| Spectrum 46    |       | 48.39 | 2.67 | 6.09  | 35.85 |      |      | 4    | 0.25 |      |        | 0.98  |      | 98.24  |
| Spectrum 47    |       | 55.21 | 0    | 0     | 48.45 |      |      | 0    | 0    |      |        | 0.06  |      | 103.72 |
| Spectrum 48    |       | 48.77 | 2.28 | 6.2   | 36.14 |      |      | 4.45 | 0.16 |      |        | 1.09  |      | 99.08  |
| Spectrum 50    |       | 51.87 | 0    | 0     | 45.52 |      |      | 0.03 | 0    |      |        | 0     |      | 97.42  |
| Spectrum 51    |       | 45.81 | 4.44 | 9.75  | 30.04 |      |      | 5.67 | 0.19 |      |        | 0.24  | 0.51 | 96.66  |
| Spectrum 52    | 2.27  | 49.68 | 2.09 | 5.65  | 30.29 | 0.99 | 0.44 | 3.38 | 0.58 | 0.08 |        | 1.69  |      | 97.13  |
| Spectrum 53    |       | 44.42 | 2.65 | 5.98  | 32.48 |      |      | 3.63 | 0.21 |      |        | 1.22  |      | 90.6   |
| Spectrum 54    |       | 44.43 | 2.63 | 5.74  | 32.83 |      | 0.13 | 3.56 | 0.09 | 0.05 | 0.12   | 0.6   |      | 90.18  |
| Spectrum 55    |       | 46.48 | 4.65 | 9.92  | 30.53 |      |      | 5.48 |      |      |        | 0.23  | 0.55 | 97.85  |
| Spectrum 56    |       | 52.73 |      |       | 46.29 |      |      |      |      |      |        |       |      | 99.02  |
| Spectrum 57    |       | 46.4  | 4.48 | 9.87  | 30.5  |      |      | 5.75 |      |      |        | 0.23  | 0.53 | 97.77  |
| Spectrum 58    |       | 46.53 | 4.59 | 10.01 | 30.53 |      |      | 5.51 |      |      |        | 0.24  | 0.5  | 97.9   |
| Spectrum 59    |       | 45.72 | 3.71 | 7.39  | 32.29 |      |      | 3.04 | 0.31 |      |        | 1     | 0.3  | 93.76  |
| Site 6         |       |       |      |       |       |      |      |      |      |      |        |       |      |        |
| Spectrum Label | O     | Na    | Al   | Si    | Cl    | K    | Ca   | Ti   | Mn   | Fe   | Total  |       |      |        |
| Spectrum 60    | 45.04 | 2.68  | 5.9  | 33.27 | 0.11  | 3.74 | 0.12 |      |      | 0.51 | 91.37  |       |      |        |
| Spectrum 61    | 44.58 | 2.45  | 5.97 | 32.55 | 0.04  | 3.98 | 0.27 | 0.08 | 0.08 | 1.16 | 91.18  |       |      |        |
| Spectrum 62    | 47.53 | 4.88  | 6.39 | 34.92 |       | 0.66 | 0.04 |      |      | 0.73 | 95.15  |       |      |        |
| Spectrum 63    | 45.85 | 2.3   | 5.96 | 33.97 |       | 4.37 | 0.09 |      |      | 0.41 | 92.95  |       |      |        |
| Spectrum 64    | 48.87 | 2.65  | 6.33 | 36.07 |       | 4.22 | 0.22 |      |      | 0.96 | 99.32  |       |      |        |
| Spectrum 65    | 49.45 | 2.94  | 6.43 | 36.56 |       | 3.93 | 0.12 |      |      | 0.68 | 100.12 |       |      |        |
| Spectrum 66    | 43.95 | 2.61  | 5.75 | 32.44 | 0.08  | 3.62 | 0.15 | 0.05 |      | 0.47 | 89.11  |       |      |        |
| Spectrum 67    | 43.86 | 2.33  | 5.85 | 32.1  |       | 4.08 | 0.37 |      |      | 1.03 | 89.61  |       |      |        |
| Spectrum 68    | 45.87 | 2.65  | 5.92 | 33.98 | 0.1   | 3.77 | 0.1  |      |      | 0.58 | 92.99  |       |      |        |
| Spectrum 69    | 45.85 | 1.88  | 5.9  | 34.09 |       | 4.83 | 0.11 |      |      | 0.28 | 92.94  |       |      |        |
