# Supplementary material for: Volcanic Glass as a Proxy for Paleotopography Suggests New Features in Late-Miocene Oregon
Source: MDPI journal article supplement (doi:10.3390/atmos15050561), 2024-04-30
Supplement: s1 [file s1]

| Sample | dD       | dD<br>water | wt.<br>%<br>H2O | Lat      | Long           | Description                                                                                                                                                                                                                                                                                                                                                                                                                                                                                                                                                                                                                                                                                                                                                                               |
|--------|----------|-------------|-----------------|----------|----------------|-------------------------------------------------------------------------------------------------------------------------------------------------------------------------------------------------------------------------------------------------------------------------------------------------------------------------------------------------------------------------------------------------------------------------------------------------------------------------------------------------------------------------------------------------------------------------------------------------------------------------------------------------------------------------------------------------------------------------------------------------------------------------------------------|
| MT-13c | -<br>169 | -139        | 5.1             | 42.98389 | -118.8731      | Outcrop shows a variety of variously weathered tuffs, many show flow banding, fine-grained matrix with small-medium volcanoclastic clasts, pumice common. Overlain by carbonates, friable, react w/HCl. Overall, outcrop is ~20-25 ft high. Sample MT-13c is an incipiently to non-welded, white, glassy tuff with very few clasts, pumice or otherwise. Sample MT-13c was sampled from the side of RT 205 north of French Glen. Specifically, on the east side of the road, sample MT-13c was sampled from discontinuous, white glassy slightly welded bed that lies conformably at the base of RST on the west side of the roadcut. This outcrop is visible on Google Streetview. This sample location was selected by me. It is directly on the side of route 205 north of French Glen |
| MT-14b | -<br>166 | -136        | 2.9             | 42.84035 | -<br>118.63633 | Clast-rich, moderately welded, gray-brown tuff, overlying buff moderately-welded, friable, crystal-poor tuff w/ashy matrix. Confusion about muds underlying tuff - are they conformable? sample taken from lighter, more friable basal section (MT-14a). Also sampled ash in top-most soil (MT-14b). Very fine grained, friable, ashy sandstone, some small black clasts, angular. This is likely an older than Devine Canyon nonwelded tuff                                                                                                                                                                                                                                                                                                                                              |
| MT-19  | -<br>140 | -110        | 3.4             | 42.85964 | -<br>119.66862 | Tan-gray glassy matrix with isolated black shards. Pumices are cm-scale and show small amounts of compression by incipient welding. Field notes are not totally conclusive regarding exact sample location. Provided coordinates reflect an outcrop from lower on the hillslope that was described but not sampled. Images from the outcrop suggest this sample was collected from beneath the highest tuff cliff on the hillslope, though this can't be totally confirmed. Recommend resampling to verify sample origin.                                                                                                                                                                                                                                                                 |
| MT-20  | -<br>151 | -121        | 2.9             | 42.78679 | -<br>119.74695 | Just off of Nasty Flat Rd. Extremely dense, presumably very welded tuff makes up base of ~8m outcrop. Above, slope lessens and there is abundant float of less welded, extremely glassy vitreous tuff. Red-brown, moderately welded tuff with large black rip-up tuff clast entrained in it. red-brown matrix features black and white fiamme, some isolated black shards. Sample collected from float on ridge top. Coordinates reflect exact sample location.                                                                                                                                                                                                                                                                                                                           |

|        |      |      |     |          |            |                                                                                                                                                                                                                                                                                                                                                                                                                                                                                                                                                                                                |
|--------|------|------|-----|----------|------------|------------------------------------------------------------------------------------------------------------------------------------------------------------------------------------------------------------------------------------------------------------------------------------------------------------------------------------------------------------------------------------------------------------------------------------------------------------------------------------------------------------------------------------------------------------------------------------------------|
| MT-21  | -137 | -107 | 3.1 | 43.91345 | -120.2242  | Prominent SW-facing hillslope w/various tuffs cropping out moving upward. Valley is very sandy, likely b/c of weathering tuffs above. At ridgetop, prominent outcrop is buff-red, moderately sorted, poorly welded, glassy tuff (MT-21). Gray-red, incipiently welded tuff with few red-brown lithics in matrix. Pumices are small (cm-scale), white, and are compressed moderately to form lens-shaped clasts (fiamme). Outcrops exhibit "flaggy" weathering and break into sheets 10-20cm thick. Sample was broken from outcrop at ridge top. Coordinates reflect precise sampling location. |
| MT-23  | -149 | -119 | 2.9 | 43.78292 | -120.30725 | Gray, moderately welded tuff. glassy matrix with gray, black, and white fiamme. sample was collected from float directly beneath ridge-capping cliff-forming outcrop above. Steep talus slope made getting to the outcrop difficult. Coordinates reflect exact site of sample collection.                                                                                                                                                                                                                                                                                                      |
| MT-24b | -175 | -145 | 3   | 43.75254 | -119.45026 | Gray-brown, moderately welded tuff with black and white fiamme. Sample MT-24b was collected ~50ft directly north of "spherulite" RST outcrop located at reported coordinates. MT-24b was found on a shallow hillslope, inferred to underlie spherulite outcrop previously described. MT-24b was broken from a larger boulder of RST, difficult to say if it is in place or float.                                                                                                                                                                                                              |
| MT-25  | -147 | -117 | 2.8 | 43.65929 | -119.00905 | At top of ridge along steep-sided canyon, west side of 395. North of Burns, abundant float at top of ridge - as good as in place. Gray-brown, moderately welded tuff with black and white compressed pumices (fiamme). Matrix consists largely of clear glass shards, with some small lithics and black shards. coordinates reflect exact sample location.                                                                                                                                                                                                                                     |
| MT-28b | -182 | -152 | 3.2 | 43.65929 | -118.99916 | Sampled from the RST type section north of Burns. MT-28a corresponds with the "partially welded, vitric" lithology from Streck and Ferns (2004)                                                                                                                                                                                                                                                                                                                                                                                                                                                |

|            |          |      |     |          |                |                                                                                                                                                                                                                                                                                                                                                                                                                                                                                                                       |
|------------|----------|------|-----|----------|----------------|-----------------------------------------------------------------------------------------------------------------------------------------------------------------------------------------------------------------------------------------------------------------------------------------------------------------------------------------------------------------------------------------------------------------------------------------------------------------------------------------------------------------------|
| MT-28bm    | -<br>182 | -152 | 2.8 | 43.65929 | -<br>118.99916 | Same as MT-28b, without magnetic shards removed                                                                                                                                                                                                                                                                                                                                                                                                                                                                       |
| MT-28a     | -<br>178 | -148 | 2.7 | 43.65929 | -<br>118.99916 | Sampled from the RST type section north of Burns. MT-28a corresponds with the "precursor ash deposit-clear glass shards" lithology from Streck and Ferns (2004)                                                                                                                                                                                                                                                                                                                                                       |
| MT-28d     | -<br>181 | -151 | 2.7 | 43.65929 | -<br>118.99916 | Sampled from the RST type section north of Burns. Mt-28d corresponds with the "nonwelded-clear and brown glass shards" layer from Streck and Ferns (2004).                                                                                                                                                                                                                                                                                                                                                            |
| MT-28dm    | -<br>181 | -151 | 2.7 | 43.70961 | -<br>118.99916 | Same at MT-28d without magnetic shards removed                                                                                                                                                                                                                                                                                                                                                                                                                                                                        |
| RST2018_08 | -<br>173 | -143 | 2.9 | 43.09215 | -119.6356      | Collected by Tessa Carlson and John Bershaw in 2018. Location referenced in Streck et al. (1999). Base is thin (what's exposed), red tuffaceous medium-grained sandstone underlying non-welded pebble-sized lapilli ash (0.5m thick)                                                                                                                                                                                                                                                                                  |
| RST2018_11 | -<br>156 | -126 | 2.7 | 44.40818 | -<br>119.93541 | Collected by Tessa Carlson and John Bershaw in 2018. Very thick Rattlesnake outcrop in footwall of Abert Rim, ~20miles south of Wagontire. Corresponds with Stop 8 in Streck et al. (1999). From base (basalt) 1.5m of vitric, unwelded tuff. Poorly sorted, matrix supported with pebble size pumices and lithics. Interpreted as debris flow. Top 10cm is black vitrophyre. Bottom is gradational, top is sharp. Base of white tuff intercalated with basalt below. Above is very thick (10s of meters) rheomorphic |

|            |          |      |     |          |                |                                                                                                                                                                                                                                                                                                                                                                      |
|------------|----------|------|-----|----------|----------------|----------------------------------------------------------------------------------------------------------------------------------------------------------------------------------------------------------------------------------------------------------------------------------------------------------------------------------------------------------------------|
|            |          |      |     |          |                | tuff that's highly deformed, largely de-vitrified, partially welded. Pebble to cobble size pumices. For this sample, took lowest (base of white tuff), dug ~5cm into the outcrop.                                                                                                                                                                                    |
| RST2018_18 | -<br>158 | -128 | 3.9 | 44.52121 | -<br>118.98748 | Collected by Tessa Carlson and John Bershaw in 2018. Sampling ash at LOC 01. White ash layer sampled twice at 70cm above the base and 1.5m above the base. 60cm from the 2nd sample to contact with a partially welded, brown ash with conspicuous horizontal fractures. This brown unit was also sampled. This sample (RST_2018_18) was taken 70cm from the bottom. |
| M2-CVG038  | -<br>146 | -116 |     | 43.02579 | -<br>119.63343 | Collected by Tessa Carlson and John Bershaw in 2018. Stable isotope analysis completed by Carlson                                                                                                                                                                                                                                                                    |
